# Supplementary material for: Pseudo-equilibrium equation of calcium phosphate precipitation from aqueous solution
Source: Royal Society of Chemistry journal article supplement (doi:10.1039/c9cp04250d), 2019-01-01
Supplement: c9cp04250d1.pdf [file c9cp04250d1.pdf]

Electronic Supplementary Information (ESI) available: Concentrations of Ca<sup>2+</sup>, Pi, and H<sup>+</sup> at pseudo-equilibrium. (mmol/L)

### Ind

| CxP5    | fCa  | pH   | LCa       | LP        | SCa       | SP        | tCa       | tP        | Calibrate | LCa       | LP        | SCa       | SP        | tCa     | tP      | Ca/P | pH   | fCa      | cCa      | fP=LP-cC  | H         |
|---------|------|------|-----------|-----------|-----------|-----------|-----------|-----------|-----------|-----------|-----------|-----------|-----------|---------|---------|------|------|----------|----------|-----------|-----------|
| 2.5E-03 | 0.54 | 7.52 | 1.505E-03 | 5.279E-03 | 1.677E-03 | 1.359E-03 | 3.182E-03 | 6.638E-03 |           | 1.182E-03 | 3.976E-03 | 1.318E-03 | 1.024E-03 | 2.5E-03 | 5.0E-03 | 1.29 | 7.52 | 5.40E-04 | 6.42E-04 | 3.334E-03 | 3.020E-08 |
| 3.0E-03 | 0.74 | 7.37 | 1.733E-03 | 4.962E-03 | 2.043E-03 | 1.687E-03 | 3.775E-03 | 6.649E-03 |           | 1.377E-03 | 3.732E-03 | 1.623E-03 | 1.268E-03 | 3.0E-03 | 5.0E-03 | 1.28 | 7.37 | 7.40E-04 | 6.37E-04 | 3.095E-03 | 4.266E-08 |
| 3.5E-03 | 0.88 | 7.35 | 2.127E-03 | 4.428E-03 | 2.315E-03 | 1.872E-03 | 4.443E-03 | 6.299E-03 |           | 1.676E-03 | 3.514E-03 | 1.824E-03 | 1.486E-03 | 3.5E-03 | 5.0E-03 | 1.23 | 7.35 | 8.80E-04 | 7.96E-04 | 2.718E-03 | 4.467E-08 |
| 4.0E-03 | 1.06 | 7.25 | 2.448E-03 | 4.362E-03 | 2.510E-03 | 2.007E-03 | 4.957E-03 | 6.369E-03 |           | 1.975E-03 | 3.425E-03 | 2.025E-03 | 1.575E-03 | 4.0E-03 | 5.0E-03 | 1.29 | 7.25 | 1.06E-03 | 9.15E-04 | 2.510E-03 | 5.623E-08 |
| 4.5E-03 | 1.44 | 7.19 | 2.484E-03 | 3.865E-03 | 2.375E-03 | 1.915E-03 | 4.859E-03 | 5.779E-03 |           | 2.301E-03 | 3.344E-03 | 2.199E-03 | 1.656E-03 | 4.5E-03 | 5.0E-03 | 1.33 | 7.19 | 1.44E-03 | 8.61E-04 | 2.483E-03 | 6.457E-08 |

### CRC

| CxP5    | fCa  | pH   | LCa       | LP        | SCa       | SP        | tCa       | tP        | Calibrate | LCa       | LP        | SCa       | SP        | tCa     | tP      | Ca/P  | pH   | fCa      | cCa      | fP=LP-cC  | H         |
|---------|------|------|-----------|-----------|-----------|-----------|-----------|-----------|-----------|-----------|-----------|-----------|-----------|---------|---------|-------|------|----------|----------|-----------|-----------|
| 2.5E-03 | 0.12 | 7.19 | 5.240E-04 | 4.508E-03 | 2.083E-03 | 1.722E-03 | 2.607E-03 | 6.230E-03 |           | 5.025E-04 | 3.618E-03 | 1.998E-03 | 1.382E-03 | 2.5E-03 | 5.0E-03 | 1.445 | 7.19 | 1.20E-04 | 3.82E-04 | 3.235E-03 | 6.457E-08 |
| 3.0E-03 | 0.21 | 6.98 | 6.248E-04 | 4.193E-03 | 2.861E-03 | 2.348E-03 | 3.486E-03 | 6.541E-03 |           | 5.376E-04 | 3.205E-03 | 2.462E-03 | 1.795E-03 | 3.0E-03 | 5.0E-03 | 1.372 | 6.98 | 2.10E-04 | 3.28E-04 | 2.878E-03 | 1.047E-07 |
| 3.5E-03 | 0.34 | 6.87 | 9.312E-04 | 3.671E-03 | 3.202E-03 | 2.583E-03 | 4.133E-03 | 6.254E-03 |           | 7.886E-04 | 2.935E-03 | 2.711E-03 | 2.065E-03 | 3.5E-03 | 5.0E-03 | 1.313 | 6.87 | 3.40E-04 | 4.49E-04 | 2.486E-03 | 1.349E-07 |
| 4.0E-03 | 0.50 | 6.71 | 1.243E-03 | 3.394E-03 | 3.504E-03 | 2.758E-03 | 4.746E-03 | 6.152E-03 |           | 1.047E-03 | 2.759E-03 | 2.953E-03 | 2.241E-03 | 4.0E-03 | 5.0E-03 | 1.317 | 6.71 | 5.00E-04 | 5.47E-04 | 2.212E-03 | 1.950E-07 |
| 4.5E-03 | 0.77 | 6.58 | 1.497E-03 | 2.950E-03 | 3.427E-03 | 2.675E-03 | 4.924E-03 | 5.624E-03 |           | 1.368E-03 | 2.622E-03 | 3.132E-03 | 2.378E-03 | 4.5E-03 | 5.0E-03 | 1.317 | 6.58 | 7.70E-04 | 5.98E-04 | 2.024E-03 | 2.630E-07 |

### 0.5H

| CxP5    | fCa  | pH   | LCa       | LP        | SCa       | SP        | tCa       | tP        | Calibrate | LCa       | LP        | SCa       | SP        | tCa     | tP      | Ca/P | pH   | fCa      | cCa      | fP=LP-cC  | H         |
|---------|------|------|-----------|-----------|-----------|-----------|-----------|-----------|-----------|-----------|-----------|-----------|-----------|---------|---------|------|------|----------|----------|-----------|-----------|
| 2.5E-03 | 0.11 | 7.18 | 4.871E-04 | 4.451E-03 | 2.565E-03 | 2.071E-03 | 3.053E-03 | 6.522E-03 |           | 3.989E-04 | 3.413E-03 | 2.101E-03 | 1.587E-03 | 2.5E-03 | 5.0E-03 | 1.32 | 7.18 | 1.10E-04 | 2.89E-04 | 3.124E-03 | 6.607E-08 |
| 3.0E-03 | 0.20 | 6.97 | 7.710E-04 | 4.238E-03 | 2.275E-03 | 1.802E-03 | 3.046E-03 | 6.039E-03 |           | 7.593E-04 | 3.508E-03 | 2.241E-03 | 1.492E-03 | 3.0E-03 | 5.0E-03 | 1.50 | 6.97 | 2.00E-04 | 5.59E-04 | 2.949E-03 | 1.072E-07 |
| 3.5E-03 | 0.32 | 6.85 | 9.277E-04 | 3.665E-03 | 3.265E-03 | 2.620E-03 | 4.192E-03 | 6.285E-03 |           | 7.745E-04 | 2.916E-03 | 2.726E-03 | 2.084E-03 | 3.5E-03 | 5.0E-03 | 1.31 | 6.85 | 3.20E-04 | 4.54E-04 | 2.461E-03 | 1.413E-07 |
| 4.0E-03 | 0.48 | 6.70 | 1.348E-03 | 3.398E-03 | 3.492E-03 | 2.775E-03 | 4.840E-03 | 6.172E-03 |           | 1.114E-03 | 2.752E-03 | 2.886E-03 | 2.248E-03 | 4.0E-03 | 5.0E-03 | 1.28 | 6.70 | 4.80E-04 | 6.34E-04 | 2.118E-03 | 1.995E-07 |
| 4.5E-03 | 0.74 | 6.57 | 1.571E-03 | 3.077E-03 | 3.344E-03 | 2.699E-03 | 4.915E-03 | 5.776E-03 |           | 1.438E-03 | 2.664E-03 | 3.062E-03 | 2.336E-03 | 4.5E-03 | 5.0E-03 | 1.31 | 6.57 | 7.40E-04 | 6.98E-04 | 1.966E-03 | 2.692E-07 |

### 1H

| CxP5    | fCa  | pH   | LCa       | LP        | SCa       | SP        | tCa       | tP        | Calibrate | LCa       | LP        | SCa       | SP        | tCa     | tP      | Ca/P  | pH   | fCa      | cCa      | fP=LP-cC  | H         |
|---------|------|------|-----------|-----------|-----------|-----------|-----------|-----------|-----------|-----------|-----------|-----------|-----------|---------|---------|-------|------|----------|----------|-----------|-----------|
| 2.5E-03 | 0.11 | 7.18 | 5.320E-04 | 4.512E-03 | 2.470E-03 | 1.990E-03 | 3.002E-03 | 6.502E-03 |           | 4.430E-04 | 3.470E-03 | 2.057E-03 | 1.530E-03 | 2.5E-03 | 5.0E-03 | 1.344 | 7.18 | 1.10E-04 | 3.33E-04 | 3.137E-03 | 6.607E-08 |
| 3.0E-03 | 0.19 | 6.97 | 7.161E-04 | 4.102E-03 | 2.953E-03 | 2.402E-03 | 3.669E-03 | 6.504E-03 |           | 5.855E-04 | 3.153E-03 | 2.415E-03 | 1.847E-03 | 3.0E-03 | 5.0E-03 | 1.308 | 6.97 | 1.90E-04 | 3.95E-04 | 2.758E-03 | 1.072E-07 |
| 3.5E-03 | 0.32 | 6.85 | 1.008E-03 | 3.723E-03 | 3.198E-03 | 2.584E-03 | 4.206E-03 | 6.307E-03 |           | 8.389E-04 | 2.951E-03 | 2.661E-03 | 2.049E-03 | 3.5E-03 | 5.0E-03 | 1.299 | 6.85 | 3.20E-04 | 5.19E-04 | 2.433E-03 | 1.413E-07 |
| 4.0E-03 | 0.47 | 6.69 | 1.256E-03 | 3.476E-03 | 3.511E-03 | 2.815E-03 | 4.767E-03 | 6.291E-03 |           | 1.054E-03 | 2.762E-03 | 2.946E-03 | 2.238E-03 | 4.0E-03 | 5.0E-03 | 1.317 | 6.69 | 4.70E-04 | 5.84E-04 | 2.179E-03 | 2.042E-07 |
| 4.5E-03 | 0.72 | 6.56 | 1.595E-03 | 3.116E-03 | 3.427E-03 | 2.730E-03 | 5.022E-03 | 5.846E-03 |           | 1.430E-03 | 2.665E-03 | 3.070E-03 | 2.335E-03 | 4.5E-03 | 5.0E-03 | 1.315 | 6.56 | 7.20E-04 | 7.10E-04 | 1.956E-03 | 2.754E-07 |

2H

| CxP5    | fCa  | pH   | LCa       | LP        | SCa       | SP        | tCa       | tP        | Calibrate | LCa       | LP        | SCa       | SP        | tCa     | tP      | Ca/P  | pH   | fCa      | cCa      | fP=LP-cC  | H         |
|---------|------|------|-----------|-----------|-----------|-----------|-----------|-----------|-----------|-----------|-----------|-----------|-----------|---------|---------|-------|------|----------|----------|-----------|-----------|
| 2.5E-03 | 0.10 | 7.17 | 4.890E-04 | 4.421E-03 | 2.508E-03 | 2.010E-03 | 2.997E-03 | 6.431E-03 |           | 4.080E-04 | 3.437E-03 | 2.092E-03 | 1.563E-03 | 2.5E-03 | 5.0E-03 | 1.339 | 7.17 | 1.00E-04 | 3.08E-04 | 3.129E-03 | 6.761E-08 |
| 3.0E-03 | 0.18 | 6.97 | 7.101E-04 | 4.107E-03 | 3.073E-03 | 2.438E-03 | 3.783E-03 | 6.545E-03 |           | 5.632E-04 | 3.138E-03 | 2.437E-03 | 1.862E-03 | 3.0E-03 | 5.0E-03 | 1.309 | 6.97 | 1.80E-04 | 3.83E-04 | 2.755E-03 | 1.072E-07 |
| 3.5E-03 | 0.30 | 6.84 | 9.167E-04 | 3.734E-03 | 3.316E-03 | 2.646E-03 | 4.232E-03 | 6.380E-03 |           | 7.581E-04 | 2.926E-03 | 2.742E-03 | 2.074E-03 | 3.5E-03 | 5.0E-03 | 1.322 | 6.84 | 3.00E-04 | 4.58E-04 | 2.468E-03 | 1.445E-07 |
| 4.0E-03 | 0.45 | 6.69 | 1.140E-03 | 3.428E-03 | 3.526E-03 | 2.799E-03 | 4.666E-03 | 6.227E-03 |           | 9.774E-04 | 2.752E-03 | 3.023E-03 | 2.248E-03 | 4.0E-03 | 5.0E-03 | 1.345 | 6.69 | 4.50E-04 | 5.27E-04 | 2.225E-03 | 2.042E-07 |
| 4.5E-03 | 0.70 | 6.56 | 1.486E-03 | 3.063E-03 | 3.533E-03 | 2.758E-03 | 5.019E-03 | 5.821E-03 |           | 1.332E-03 | 2.631E-03 | 3.168E-03 | 2.369E-03 | 4.5E-03 | 5.0E-03 | 1.337 | 6.56 | 7.00E-04 | 6.32E-04 | 1.999E-03 | 2.754E-07 |

4H

| CxP5    | fCa  | pH   | LCa       | LP        | SCa       | SP        | tCa       | tP        | Calibrate | LCa       | LP        | SCa       | SP        | tCa     | tP      | Ca/P  | pH   | fCa      | cCa      | fP=LP-cC  | H         |
|---------|------|------|-----------|-----------|-----------|-----------|-----------|-----------|-----------|-----------|-----------|-----------|-----------|---------|---------|-------|------|----------|----------|-----------|-----------|
| 2.5E-03 | 0.09 | 7.14 | 4.461E-04 | 4.462E-03 | 2.504E-03 | 1.984E-03 | 2.950E-03 | 6.445E-03 |           | 3.781E-04 | 3.461E-03 | 2.122E-03 | 1.539E-03 | 2.5E-03 | 5.0E-03 | 1.379 | 7.14 | 9.00E-05 | 2.88E-04 | 3.173E-03 | 7.244E-08 |
| 3.0E-03 | 0.17 | 6.95 | 7.061E-04 | 4.461E-03 | 3.096E-03 | 2.446E-03 | 3.803E-03 | 6.907E-03 |           | 5.571E-04 | 3.229E-03 | 2.443E-03 | 1.771E-03 | 3.0E-03 | 5.0E-03 | 1.380 | 6.95 | 1.70E-04 | 3.87E-04 | 2.842E-03 | 1.122E-07 |
| 3.5E-03 | 0.28 | 6.82 | 9.082E-04 | 3.739E-03 | 3.363E-03 | 2.674E-03 | 4.272E-03 | 6.412E-03 |           | 7.442E-04 | 2.915E-03 | 2.756E-03 | 2.085E-03 | 3.5E-03 | 5.0E-03 | 1.322 | 6.82 | 2.80E-04 | 4.64E-04 | 2.451E-03 | 1.514E-07 |
| 4.0E-03 | 0.44 | 6.67 | 1.211E-03 | 3.553E-03 | 3.487E-03 | 2.715E-03 | 4.698E-03 | 6.268E-03 |           | 1.031E-03 | 2.834E-03 | 2.969E-03 | 2.166E-03 | 4.0E-03 | 5.0E-03 | 1.371 | 6.67 | 4.40E-04 | 5.91E-04 | 2.243E-03 | 2.138E-07 |
| 4.5E-03 | 0.67 | 6.54 | 1.578E-03 | 3.262E-03 | 3.511E-03 | 2.787E-03 | 5.090E-03 | 6.050E-03 |           | 1.396E-03 | 2.696E-03 | 3.104E-03 | 2.304E-03 | 4.5E-03 | 5.0E-03 | 1.347 | 6.54 | 6.70E-04 | 7.26E-04 | 1.971E-03 | 2.884E-07 |

8H

| CxP5    | fCa  | pH   | LCa       | LP        | SCa       | SP        | tCa       | tP        | Calibrate | LCa       | LP        | SCa       | SP        | tCa     | tP      | Ca/P  | pH   | fCa      | cCa      | fP=LP-cC  | H         |
|---------|------|------|-----------|-----------|-----------|-----------|-----------|-----------|-----------|-----------|-----------|-----------|-----------|---------|---------|-------|------|----------|----------|-----------|-----------|
| 2.5E-03 | 0.05 | 7.05 | 3.284E-04 | 4.309E-03 | 2.525E-03 | 1.989E-03 | 2.853E-03 | 6.298E-03 |           | 2.877E-04 | 3.421E-03 | 2.212E-03 | 1.579E-03 | 2.5E-03 | 5.0E-03 | 1.401 | 7.05 | 5.00E-05 | 2.38E-04 | 3.183E-03 | 8.913E-08 |
| 3.0E-03 | 0.11 | 6.87 | 5.165E-04 | 4.136E-03 | 2.767E-03 | 2.127E-03 | 3.284E-03 | 6.263E-03 |           | 4.719E-04 | 3.302E-03 | 2.528E-03 | 1.698E-03 | 3.0E-03 | 5.0E-03 | 1.489 | 6.87 | 1.10E-04 | 3.62E-04 | 2.940E-03 | 1.349E-07 |
| 3.5E-03 | 0.21 | 6.70 | 9.971E-04 | 3.841E-03 | 3.338E-03 | 2.616E-03 | 4.336E-03 | 6.458E-03 |           | 8.049E-04 | 2.974E-03 | 2.695E-03 | 2.026E-03 | 3.5E-03 | 5.0E-03 | 1.330 | 6.70 | 2.10E-04 | 5.95E-04 | 2.379E-03 | 1.995E-07 |
| 4.0E-03 | 0.36 | 6.52 | 1.077E-03 | 3.359E-03 | 3.814E-03 | 2.959E-03 | 4.891E-03 | 6.318E-03 |           | 8.807E-04 | 2.658E-03 | 3.119E-03 | 2.342E-03 | 4.0E-03 | 5.0E-03 | 1.332 | 6.52 | 3.60E-04 | 5.21E-04 | 2.138E-03 | 3.020E-07 |
| 4.5E-03 | 0.61 | 6.42 | 1.493E-03 | 3.260E-03 | 3.817E-03 | 2.965E-03 | 5.310E-03 | 6.225E-03 |           | 1.265E-03 | 2.618E-03 | 3.235E-03 | 2.382E-03 | 4.5E-03 | 5.0E-03 | 1.358 | 6.42 | 6.10E-04 | 6.55E-04 | 1.963E-03 | 3.802E-07 |

12H

| CxP5    | fCa  | pH   | LCa       | LP        | SCa       | SP        | tCa       | tP        | Calibrate | LCa       | LP        | SCa       | SP        | tCa     | tP      | Ca/P  | pH   | fCa      | cCa      | fP=LP-cC  | H         |
|---------|------|------|-----------|-----------|-----------|-----------|-----------|-----------|-----------|-----------|-----------|-----------|-----------|---------|---------|-------|------|----------|----------|-----------|-----------|
| 2.5E-03 | 0.03 | 7.04 | 3.743E-04 | 4.397E-03 | 2.707E-03 | 2.090E-03 | 3.081E-03 | 6.487E-03 |           | 3.037E-04 | 3.389E-03 | 2.196E-03 | 1.611E-03 | 2.5E-03 | 5.0E-03 | 1.363 | 7.04 | 3.00E-05 | 2.74E-04 | 3.115E-03 | 9.120E-08 |
| 3.0E-03 | 0.08 | 6.81 | 5.195E-04 | 4.181E-03 | 3.103E-03 | 2.366E-03 | 3.623E-03 | 6.547E-03 |           | 4.302E-04 | 3.193E-03 | 2.570E-03 | 1.807E-03 | 3.0E-03 | 5.0E-03 | 1.422 | 6.81 | 8.00E-05 | 3.50E-04 | 2.843E-03 | 1.549E-07 |
| 3.5E-03 | 0.17 | 6.61 | 6.802E-04 | 3.775E-03 | 3.578E-03 | 2.730E-03 | 4.258E-03 | 6.505E-03 |           | 5.591E-04 | 2.902E-03 | 2.941E-03 | 2.098E-03 | 3.5E-03 | 5.0E-03 | 1.401 | 6.61 | 1.70E-04 | 3.89E-04 | 2.512E-03 | 2.455E-07 |
| 4.0E-03 | 0.33 | 6.44 | 1.054E-03 | 3.436E-03 | 3.627E-03 | 2.793E-03 | 4.681E-03 | 6.230E-03 |           | 9.006E-04 | 2.758E-03 | 3.099E-03 | 2.242E-03 | 4.0E-03 | 5.0E-03 | 1.382 | 6.44 | 3.30E-04 | 5.71E-04 | 2.187E-03 | 3.631E-07 |
| 4.5E-03 | 0.60 | 6.36 | 1.533E-03 | 3.310E-03 | 3.524E-03 | 2.736E-03 | 5.057E-03 | 6.046E-03 |           | 1.364E-03 | 2.737E-03 | 3.136E-03 | 2.263E-03 | 4.5E-03 | 5.0E-03 | 1.386 | 6.36 | 6.00E-04 | 7.64E-04 | 1.973E-03 | 4.365E-07 |
